# Supplementary material
Source: PubMed Central journal article supplement (PMC5703304)
Supplement: pnas.201711530SI.pdf [file pnas.201711530SI.pdf]

# Supporting Information

Brennan et al. 10.1073/pnas.1711530114

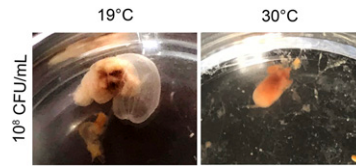

**Fig. S1.** *V. coralliilyticus* disease progression in *N. vectensis* is temperature-dependent. Anemones infected with  $10^8$  cfu/mL *V. coralliilyticus* were kept at the normal husbandry temperature (19 °C) or at 30 °C for 9 d. On day 9, infected anemones housed at 19 °C were alive (*Left*), but anemones at 30 °C were dead and exhibited severe to complete ectodermal tissue degradation (*Right*).

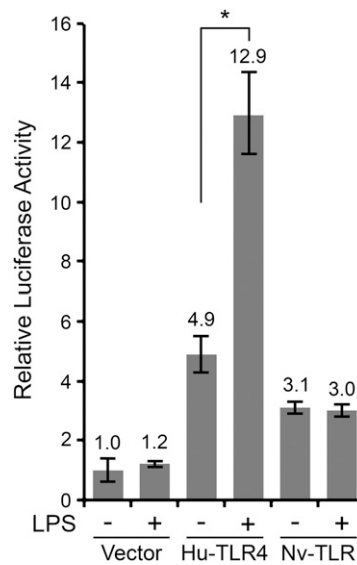

**Fig. S2.** LPS does not stimulate an Nv-TLR-to-NF- $\kappa$ B pathway in human cells. An NF- $\kappa$ B-responsive reporter assay was performed in HEK 293 cells transfected with the human coreceptors MD-2 and CD-14. Cells were also transfected with Nv-TLR, Hu-TLR4, or the control vector and then were treated with LPS for 6 h. Luciferase activity values were normalized to the vector control (1.0) and are the averages of duplicates. Data are expressed as means  $\pm$  SEM. Statistical significance was determined using Student's *t* test; \**P* < 0.05.



**Table S1. Identified leucine-rich repeat motifs, NF motif, CF motifs, and putative transmembrane domain in Nv-TLR**

| Motif                          | Residues | Sequence                                                                                        |
|--------------------------------|----------|-------------------------------------------------------------------------------------------------|
| Leucine-rich repeat motif      | 216–247  | LQALDLNNSLT [1] PPD [8] SLPRNL [1] R                                                            |
| Leucine-rich repeat motif      | 248–288  | L [19] RFLVLDYNQI [2] LSQYPFTGH                                                                 |
| Leucine-rich repeat motif      | 289–312  | LQKLSIKGNGLRVIGG [7] G                                                                          |
| Leucine-rich repeat motif      | 312–336  | VNIIDLSNNEIR [4] QLFRG [2] S                                                                    |
| Leucine-rich repeat motif      | 337–360  | MLELRFNHNFL [2] LPNRVFTDM [1] R                                                                 |
| Leucine-rich repeat motif      | 361–384  | LKRLYLNNRNLQ [5] LLYGN [1] E                                                                    |
| Leucine-rich repeat motif      | 385–408  | IETLTLNDNDLT [2] ENNALPEN [1] N                                                                 |
| Leucine-rich repeat motif      | 410–432  | LKTLTLQRNRLT [1] VPRAVFLL [1] N                                                                 |
| Leucine-rich repeat motif      | 475–500  | LK [4] ELNLANNI [3] DIGSL                                                                       |
| CF motif                       | 520–575  | PLI <b>C</b> NCKLTALFRLLKRLTADYPDVTHAQFDSW <b>I</b> CSQPTRLRNVALLRV <b>PENQ</b> F <b>C</b>      |
| NF motif                       | 582–615  | <b>C</b> PRE <b>C</b> T <b>C</b> AVRE [6] V <b>C</b> SERGLH RLPF [1] MPA                        |
| Leucine-rich repeat motif      | 639–662  | ITVLELSNNEIK [5] FVDSL [1] R                                                                    |
| Leucine-rich repeat motif      | 663–685  | VVNLAINDNKLK [2] PRGVTNL [1] A                                                                  |
| CF motif                       | 697–748  | FFV <b>C</b> DCYASWMRDWL [1] NN [1] DK [1] EDT [1] SIL <b>C</b> ASG [6] IISVP [3] FN <b>C</b> S |
| Leucine-rich repeat region     | 216–697  | –                                                                                               |
| Predicted transmembrane domain | 765–787  | LLAIVLAVLLVLSVAVFVMTYCF                                                                         |

Leucine-rich repeat structural motifs, an N-terminal LRR cysteine cluster (NF motif), and two C-terminal LRR cysteine clusters (CF motifs) were predicted using NCBI BLAST. Cysteines in each cluster are in red font. Bracketed numbers represent gaps in alignment with canonical domains and motifs. Transmembrane domain prediction was performed with the Center for Biological Sequence Analysis's TMHMM Server version 2.0 ([www.cbs.dtu.dk/services/TMHMM/](http://www.cbs.dtu.dk/services/TMHMM/)).

**Table S2. Quantification of Nv-TLR<sup>+</sup> cells following morpholino injection**

| Data classification | Morpholino |        |
|---------------------|------------|--------|
|                     | Control    | Nv-TLR |
| No. of animals      | 55         | 55     |
| Range               | 2–282      | 0–139  |
| Median              | 81         | 10     |
| Mean                | 92.3       | 14.5   |
| SD                  | 65.6       | 19.3   |
| SE                  | 8.8        | 2.6    |

Anemones were injected with either control or Nv-TLR morpholinos. Representative images of these injected anemones are shown in Fig. 7B. Optical cross-sections were taken through the ectoderm with a FluoView FV10i confocal microscope. The number of Nv-TLR-positive cells was counted from 55 anemones (5 d postinjection) for both the control and Nv-TLR morpholino-injected groups. The range, median, and mean numbers of Nv-TLR-positive cells, along with SDs and SEs for these counts, are reported. Nv-TLR<sup>+</sup> cells were identified and counted using FIJI image processing software (61).

**Table S3. Mammalian and bacterial expression vectors used in this study**

| Plasmid name             | Description and/or source                                                                                                                                                    |
|--------------------------|------------------------------------------------------------------------------------------------------------------------------------------------------------------------------|
| pUC57-Nv-TLR             | pUC57 with a full-length codon-optimized Nv-TLR cDNA with a 5' EcoRI restriction site and a 3' NotI restriction site. Synthesized by GenScript.                              |
| pcDNA-FLAG               | Mammalian expression vector with 5' FLAG (34)                                                                                                                                |
| FLAG-Nv-TLR              | EcoRI-NotI fragment containing codons 2–969 of Nv-TLR from pUC57-Nv-TLR was subcloned into EcoRI-NotI-digested pcDNA-FLAG.                                                   |
| FLAG-Nv-TLR $\Delta$ TIR | PCR-amplified from FLAG-Nv-TLR using Gibson primers to insert codons 2–814 into pcDNA-FLAG. Primers: NvTLR-FWD-FLAG and NvTLR $\Delta$ TIR-REV                               |
| FLAG-Nv-NF- $\kappa$ B   | (34)                                                                                                                                                                         |
| FLAG-MAL                 | From Jan Tavernier, Ghent University, Ghent, Belgium                                                                                                                         |
| FLAG-MyD88               | From Claudio Sette, University of Rome, Rome                                                                                                                                 |
| pMSCV-puro               | Retroviral mammalian expression vector with puromycin resistance                                                                                                             |
| pMSCV-Nv-TLR             | PCR amplified from FLAG-Nv-TLR using Gibson primers to insert codons 1–969 into pMSCV-puro. Primers: NvTLRpMSCV-FWD and NvTLRpMSCV-REV.                                      |
| pcDNA3.1+                | (Invitrogen)                                                                                                                                                                 |
| pcDNA-Nv-TLR             | PCR amplified from FLAG-Nv-TLR using Gibson primers to insert codons 1–969 into pcDNA3.1+. Primers: NvTLR-FWD-pcDNA3.1+ and NvTLR-REV-pcDNA3.1+.                             |
| 3x- $\kappa$ B site LUC  | (34)                                                                                                                                                                         |
| RSV- $\beta$ GAL         | (55)                                                                                                                                                                         |
| HA-TLR4                  | From Adeline Hajjar, University of Washington, Seattle                                                                                                                       |
| CD14                     | From Adeline Hajjar, University of Washington, Seattle                                                                                                                       |
| MD-2                     | From Adeline Hajjar, University of Washington, Seattle                                                                                                                       |
| pGEX-KG                  | Bacterial expression vector with 5' GST (32)                                                                                                                                 |
| GST-Nv-TIR               | EcoRI-XhoI fragment containing Nv-TLR codons 748–969 was subcloned in EcoRI-XhoI-digested pGEX-KG. Primers: GST-NvTIR-FWD and GST-NvTIR-REV. PCR amplified from FLAG-Nv-TLR. |

**Table S4. Primers used in this study**

| Primers                       | Sequence                                         |
|-------------------------------|--------------------------------------------------|
| NvTLR-FWD-pcDNA3.1+           | 5'-TAGTCCAGTGTGGTGGATGAAAGGGAGTATTCTGC GCC-3'    |
| NvTLR-REV-pcDNA3.1+           | 5'-TGCTGGATATCTGCAGTTAGACTTTGGACATTTTCGA C-3'    |
| NvTLR-FWD-FLAG                | 5'-ACGTGCTGCAGATGCGAATTCAAAAGGGAGTATTC TGC-3'    |
| NvTLR-REV-FLAG                | 5'-GCTCGAGGGATCCCTGTTAGACTTTGGACATTTTCG AC-3'    |
| GST-NvTIR-FWD                 | 5'-GCGCGCGAATTCTAGCCTACCGGCCACCCGTGCCA-3'        |
| GST-NvTIR-REV                 | 5'-GCGCGCTCGAGTTAGACTTTGGACATTTTCGAC-3'          |
| NvTLR $\Delta$ TIR-REV        | 5'-GCTCGAGGGATCCCTGTTAGACTCTTGCTCACGTC GGTATC-3' |
| NvTLRpMSCV-FWD                | 5'-GATCTCTCGAAGTTAACGATGAAAGGGAGTATTC TGCGCC-3'  |
| NvTLRpMSCV-REV                | 5' GCCTCCCTACCCGGTAGTTAGACTTTGGACATT TCGAC-3'    |
| GAPDH-FWD                     | 5'-TGGTATCGTGAAGGACTCATGAC-3'                    |
| GAPDH-REV                     | 5'-ATGCCAGTGAGCTTCCCGTTCAGC-3'                   |
| NvTLRqPCR-FWD                 | 5'-ACCTGGCCATCAACGACAAT-3'                       |
| NvTLRqPCR-REV                 | 5'-CCAGCTGGCATAACAATCGC-3'                       |
| EMSA NF- $\kappa$ B-consensus | 5'-TCGAGAGGTGCGGGGAATTCCTCCCGCCG-3'              |
|                               | 5'-TCGACGGGGGGGAATTCCTCCCGACCTC-3'               |

**Dataset S1. Native, codon-optimized, and translated Nv-TLR sequences**[Dataset S1](#)

A black sequence indicates the nucleotide sequence of the codon-optimized Nv-TLR used in this paper. A red sequence indicates nucleotides in the native Nv-TLR sequence. A dash indicates that the original nucleotide at that position was not changed in the codon-optimized sequence. The translated amino acid sequence is in blue.

**Dataset S2. *N. vectensis* TLR-to-NF- $\kappa$ B and cGAS-STING homolog sequences**[Dataset S2](#)

cDNA sequences were used as a reference to map raw nematosome RNA-seq reads (41) and to determine the relative expression (in RPKM) of TLR-to-NF- $\kappa$ B and cGAS-STING pathway homologs. Partial sequences are indicated.

### Dataset S3. TIR domain sequences for phylogenetic analysis

#### [Dataset S3](#)

Full-length TLR sequences from *Homo sapiens*, *N. vectensis*, *D. melanogaster*, *C. elegans*, and *A. queenslandica* are included with their respective TIR domains in bold font. These truncated and culled TIR domain sequences were later aligned by Clustal Omega (53), and neighbor-joining analysis was performed by PAUP\* (Fig. 1B) (54).
