# Supplementary material
Source: PubMed Central journal article supplement (PMC5703304)
Supplement: pnas.1711530114.sd01.pdf [file pnas.1711530114.sd01.pdf]

Codon Optimized Native Amino Acids

ATGAAAGGGAGTATTCTGCGCCAGGTCACCCAGTGT TTTTGTAAACGCTTGGGTCTCAGTGCTGTTTCTGCGAGCT  
-----G-T-C-A-AAG--A-A-T-----C-T-T-C-C-T-C  
M K G S I L R Q V T Q C F C N A W V S V L F L R A

CTGCTGATTGCCGGAGCCCCATCCAGAGATGAGAACTGCAAGAAGGAGTGTGCCAATCTGAGAATGCCAGCACC  
T--A-A-T-T-G-T-GC-----A--C-G--TC-C--GTCG--A  
L L I A G A P S R D E N C K K E C A N L R M P S T

TTCAGGTCCCCAACAGGCCAGATCCCCATGTTCTTTACCAAGTGCAGATCAAGGGCGGCGCAGAGTGTAGCCTG  
-----AAG--T-----G-T-----T--T--A-----TCA--  
F R S P T G Q I P M F F T K C E I K G G A E C S L

GACCTGGGACCATGGATCCAGCCACTGGCCAACAGCTCCACCGTGCAGTACTATCTGGCCATCGTGTGCAGGTCT  
--T--T-G--T-A-C-T-T--TCA--A--T-----T-----C--TC-C--A  
D L G P W I Q P L A N S S T V Q Y Y L A I V C R S

AGCACAGCATCATCTTCTGTAACCTCCCCTGAGGTGAAGAGGAAGAATGTGATCCTGTTTTACCAGATGGCAGGA  
-----GA-A--A--A--T--C--TAG--A--A--C--C--A--TT-----T-----C  
S T R I I F C N S P E V K R K N V I L F Y Q M A G

CCATGCAGCGTGACCGTGCACGACGTGAGCGTGCTGGGCAATGCCACCGACTACAGAGTGCAGCTGTTACACAC  
--G--T--T--T--A--T--T--T--ATCT--T--T-----C-----T-AT--TC-C--A-----T-----  
P C S V T V H D V S V L G N A T D Y R V Q L F T H

GGCGCCGAGCTGCTGTATGCCGACACCGAGAGCATCACAGGCCTGAGGAACATCGGCACATTCTCCCTGCAGTCC  
-----G-A-A-T--G-G-T-A-A-----G-G--C-C-T-T-G--T-G-A--G--  
G A E L L Y A D T E S I T G L R N I G T F S L Q S

TCTGGCACC GGCCATCCCACGCATCCTGACAGGCTTTGAGTGGCCAAGGATGGCCGAGGTGCTGCTGTCCAACCTG  
AGC--A--A--G--T--CA-A--T-A-G--G-----A-----TC-T-----T-A-A--T-A-----T--C  
S G T G I P R I L T G F E W P R M A E V L L S N L

TCTATCACCGAGATCCCCGAGCAGTTTAAGACAGCCATGCCTCGCCTGCAGGCCCTGGATCTGAACAATAACAGC  
--C--G--T-G-A-----G-T-----A-A-A--T-A-----C-----  
S I T E I P E Q F K T A M P R L Q A L D L N N N S

CTGACCCGGCCCCCTGACTTCCCATGGTCTCACAAGCCTCTGAGCCTGCCACGGAACCTGAGCAGACTGCCCGTG  
T-----A--A--G--C--AGC--T-----G--T--T--C-----C-G--C--T--  
L T R P P D F P W S H K P L S L P R N L S R L P V

TTTAATCACC ACTACCAGGAAGGCAGCGTGGTGCAGCCTAGACTGTACCGGAGATTCTGGTGTGGATTATAAC  
-----T-----G-T-----AC-C--T--T--CC-C--T--TT--C--C--C--C--  
F N H H Y Q E G S V V Q P R L Y R R F L V L D Y N

CAGATCAGGAATCTGTCTCAGTATCCCTTTACCGGCCACCTGCAGAAGCTGAGCATCAAGGGAAACGGACTGAGG  
-----TC-C--C--A-A--C--G--C--G--T--T-----A--A--ATCG--C-----T--GT--C-C  
Q I R N L S Q Y P F T G H L Q K L S I K G N G L R

Codon Optimized Native Amino Acids

GTGATCGGCGGCAGCTGTTTTCTCCAACCTGTCTGGCGTGAATATCATCGATCTGTCTAATAACGAGATCAGAGAC  
--T--A--TCT--AG--TT-AAGC--A--A--C--T--C--TAG--C--C--T--  
V I G G S C F S N L S G V N I I D L S N N E I R D

TTCCCTGAGCAGCTGTTTTAGGGGCCAGGGCTCCATGCTGGAGCTGAGATTCAACCACAATTTTCTGTCTACCCTG  
--T--G--A--T--C--A--T--A--A--C--T--T--AC--G--C--C--G--T--  
F P E Q L F R G Q G S M L E L R F N H N F L S T L

CCAAATAGGGTGTTTACAGACATGAAGCGGCTGAAGAGACTGTACCTGAATAACAATAGGCTGCAGCGCCTGCAG  
--T--C--C--G--T--A--C--AC--G--T--T--T--C--A--C--T--  
P N R V F T D M K R L K R L Y L N N N R L Q R L Q

GCAGGACTGCTGTATGGCAACGAGGAGATCGAGACCCTGACACTGAACGACAATGATCTGACCGAGATCGAGAAC  
--C--G--A--C--G--A--A--A--T--A--T--T--C--T--A--G--T--  
A G L L Y G N E E I E T L T L N D N D L T E I E N

AATGCCCTGCCCCGAGAACAGCAATACCCTGAAGACCCTGACACTGCAGCGGAATAGACTGACACGGGTGCCTAGA  
--C--T--A--TC--C--T--C--TT--CT--A--A--CC--C--A--T--AC--  
N A L P E N S N T L K T L T L Q R N R L T R V P R

GCCGTGTTCTGCTGAGAAACCTGGAGAGCGCCGATCTGAGCTCCAATGCCATCACCTTCGGCGGCATCCTGGAC  
--A--A--G--C--G--CT--TCG--C--G--T--G--T--C--  
A V F L L R N L E S A D L S S N A I T F G G I L D

GTGCTGGATTCCGTGACAGCCGATCAGCTGTTTTACAACCTGAGGCGCTCCGCCTCTAGCTCCGACAATCAGCTG  
--A--C--C--G--T--T--C--AA--A--GAG--TC--G--T--  
V L D S V T A D Q L F Y N L R R S A S S S D N Q L

AAGTCTACCAAGGTGGAGCTGAACCTGGCCAACAATGGCATCTCTAGCATCGACATCGGCTCCCTGAACAAGACA  
--AGC--A--C--C--T--T--A--AAG--T--T--TAG--A--T--C--  
K S T K V E L N L A N N G I S S I D I G S L N K T

CAGCTGGGCAAGCTGAAGGTGATCCTGAGAGTGTACCACATCGACCTGAGGGATAACCCACTGATCTGCAATTGT  
--G--A--TC--C--C--T--T--C--C--C--C--T--T--C--C--  
Q L G K L K V I L R V Y H I D L R D N P L I C N C

AAGCTGACCGCCCTGTTTCAGGCTGCTGAAGCGCCTGACCGCCGACTATCCCGATGTGACACACGCCAGTTTGT  
--A--T--A--G--C--C--C--A--TT--A--G--T--T--A--T--G--  
K L T A L F R L L K R L T A D Y P D V T H A Q F D

TCTTGGATCTGCAGCCAGCCTACAAGGCTGAGGAACGTGGCCCTGCTGAGGGTGCCAGAGAATCAGTTCCAGTGC  
--C--T--TTCA--C--AT--C--C--T--T--C--C--C--T--C--A--  
S W I C S Q P T R L R N V A L L R V P E N Q F Q C

Codon Optimized Native Amino Acids

ATCATGGACCTGGAGAATTGTCCAAGGGAGTGCACCTGTGCCGTGCGGGAGATCGACCAGACCGTGCTGGTCGAC  
--T-----T-----C-----T-A-C-A-T-C-----A-----A-A-----A-G-----  
I M D L E N C P R E C T C A V R E I D Q T V L V D

TGTTCCGAGCGGGGCTGCACAGACTGCCCTTTAAGATGCCTGCAGGAGAGCTGGAAGTGAACCTGCGGGGAAAT  
--AGT-----C-G-C-TC-C-----G-C-----C-----A-A-G-----T-AA-A-C-C-  
C S E R G L H R L P F K M P A G E L E V N L R G N

GCCATCAGAGAGCTGCCCTGGAGGCACTACCTGGGCAACATCACCGTGCTGGAGCTGTCTAACAATGAGATCAAG  
--G-A-G-AT-A-T-C-----T-A-----A-AT-A-AT-AG--T-C-A-A-A-  
A I R E L P W R H Y L G N I T V L E L S N N E I K

GAGCTGAATATGACATTCGTGGATAGCCTGGCCCGCGTGGTGAACCTGGCCATCAACGACAATAAGCTGAAGTAC  
--AT-A-C-----T-A--TCT-----G-G-A-C-T-T-G-A-T-----C-----  
E L N M T F V D S L A R V V N L A I N D N K L K Y

CTGCCTCGGGCGTGACCAATCTGACAGCCAGGGAGGGCTTTTCGCTCTCTGAGCATCTCCACAACCTTCTTCGTG  
--T-----T-T-C-G-C-T-G-GC-A-----C-A-AT-TCG--AG--T-----  
L P R G V T N L T A R E G F R S L S I S H N F F V

TGCGATTGTTATGCCAGCTGGATGCGGGACTGGCTGGCCAACAATACCGACAAGATCGAGGATACATCCTCTATC  
-----C-C-C-A-T-----C-----A-G-----G-T-----A-C--GAGTAGC--T-  
C D C Y A S W M R D W L A N N T D K I E D T S S I

CTGTGCGCATCTGGCCGCTGGAGGGACTGCCTATCATCTCCGTGCCACTGTCTGATTTCAATTGTAGCGCCTAC  
--C-T-----T-T-A-----CT-A-C-----AGT--A--TT-AAG-----C-C-----G-----  
L C A S G R L E G L P I I S V P L S D F N C S A Y

CGGCCACCCGTGCCAGGACCTATCACCGACGGACTGTCCCTGCTGCTGGCAATCGTGCTGGCCGTGCTGCTGGTG  
A-A-----G-----G-----T-T-T-A--T-----C-C-----AT--G-T-C-----C-  
R P P V P G P I T D G L S L L L A I V L A V L L V

CTGTCTGTGGTGGCCTTCGTGATGACCTACTGCTTTAGATGGGAGATGAAGATCCTGATGTATACACACTTCAAC  
--TAG-----G-----A-----T-----CC-----C-----C-G-----  
L S V V A F V M T Y C F R W E M K I L M Y T H F N

TGGCACCCTTTTGACAGGGTGGACGATACCGACGTGAGCAAGATCTACGACACATTCATCTCTTATAGCTCCCAG  
-----T-G-C--C-A-T-----C-G-----TCG--A-----T-----G-----G-C--TAGT--A-  
W H P F D R V D D T D V S K I Y D T F I S Y S S Q

GATGCAAGCTGGGTGAGGAGACCCTGCAGCGGACACTGGAGTCCCACGTGCCTCCATATCGCCTGTGCATCCAC  
--C-C-T-----GC-----A-T-A--A-----C-C--AGT-----G-C--CA-G-A-----  
D A S W V R E T L Q R T L E S H V P P Y R L C I H

GACCGGGATTTTGGAGATCGGCGCCTCTATCCACGACAACATCCTGAATAGCGTGCGGCTGTCCAAGAGAATGATC  
--A-----C-C-----G--AGC--T-----T-T-----C-----TT--CT--AGT--AC-C-----  
D R D F E I G A S I H D N I L N S V R L S K R M I

Codon Optimized Native Amino Acids

ATGGTGCTGTCCAATCACTTCATCGCCTCTGAGTGGTGTAGGCTGGAGTTTCGCGCCGCCACCAGAAGGTGCTG  
-----AT-----T-----T--GAGC-----T-----G--A-----A-----C  
M V L S N H F I A S E W C R L E F R A A H Q K V L

GAGGATCGCACCAACTACCTGATCATCATCCTGTTTTGACGATGTGGACCCAGCACCCCTGGACGATGAGACAAAG  
--A--CA-G--A-----T-----T--C--C--C--C-----TC--T--A-----C-----C-----  
E D R T N Y L I I I L F D D V D P S T L D D E T K

CTGTACCTGCGGACCAACACATATCTGTCTGTGAGCAATAAGTGGTTCTGGCAGAAGCTGTTTTATGCCCTGCCT  
--A-----CA-----G--T--C-----AAGC--C--T--C-----T-----A--A-----C--GT-----C  
L Y L R T N T Y L S V S N K W F W Q K L F Y A L P

AAACCTCTGGCTCCACCACAGTCTACGAAGGGCATGTCGAAATGTCCAAAGTCTAA  
-----A--CG-C--T-----AGT--T--G-----G--G-----A--G-----G--  
K P L A P P Q S Y E G H V E M S K V \*
